# Supplementary material for: The Impact of HIV Co-Infection on the Genomic Response to Sepsis
Source: PubMed Central journal article supplement (PMC4752296; doi:10.1371/journal.pone.0148955), 2016-02-12

**S1 Figure: Ingenuity canonical signaling pathways associated with over-expressed genes in HIV positive sepsis patients as compared to HIV negative sepsis patients. (A) granzyme A signaling, and (B) CTLA4 signaling in cytotoxic T lymphocytes. Red colored genes denote over-expression in HIV positive sepsis patients.**

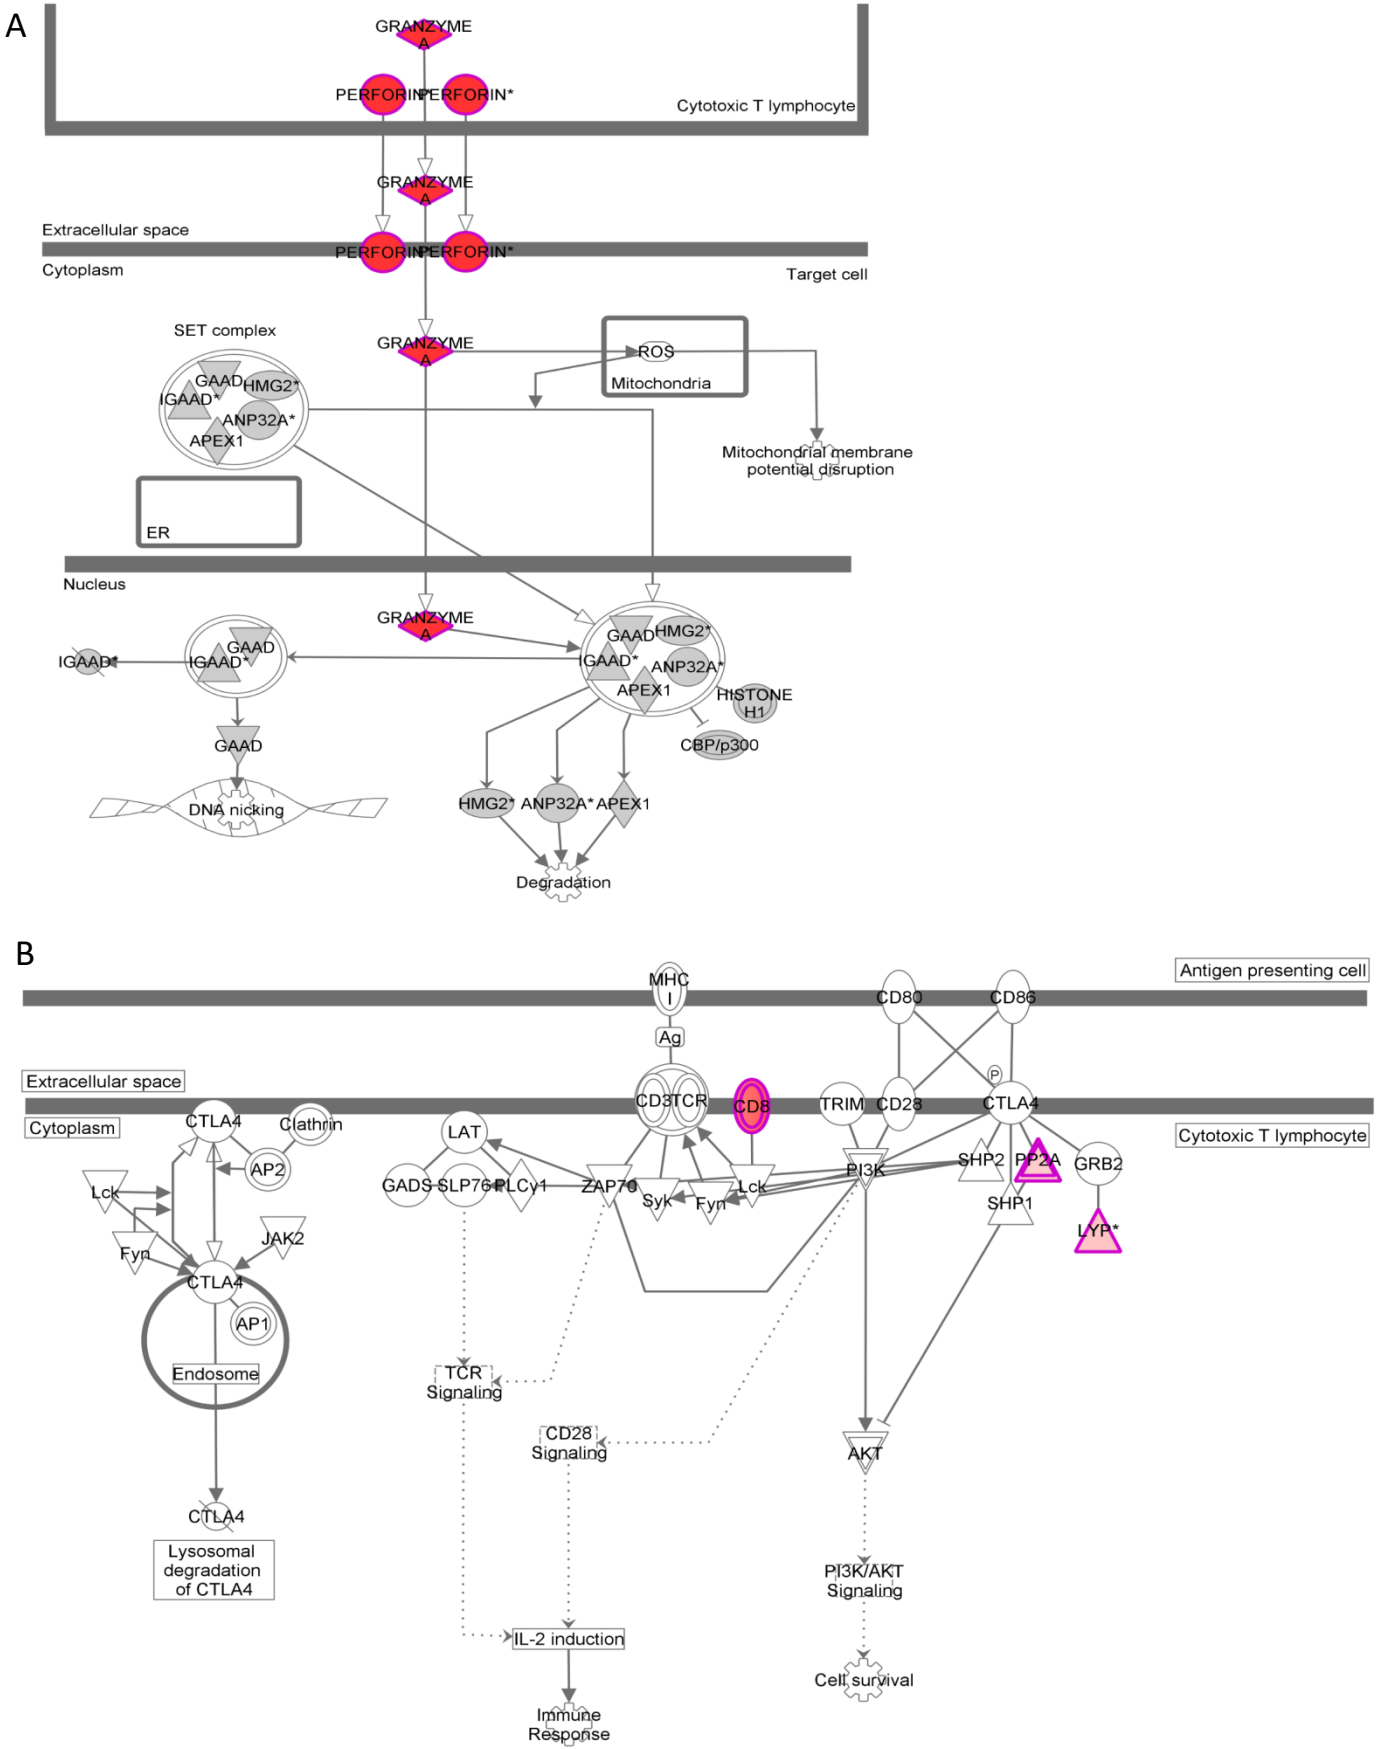

Supplement: pone.0148955.s001.pdf [file pone.0148955.s001.pdf]
