# Supplementary material for: The Impact of HIV Co-Infection on the Genomic Response to Sepsis
Source: PubMed Central journal article supplement (PMC4752296; doi:10.1371/journal.pone.0148955), 2016-02-12
Supplement: pone.0148955.s002.pdf [file pone.0148955.s002.pdf]

S2 Figure: Plasma levels of granzyme A and granzyme B in sepsis patients with or without HIV infection.

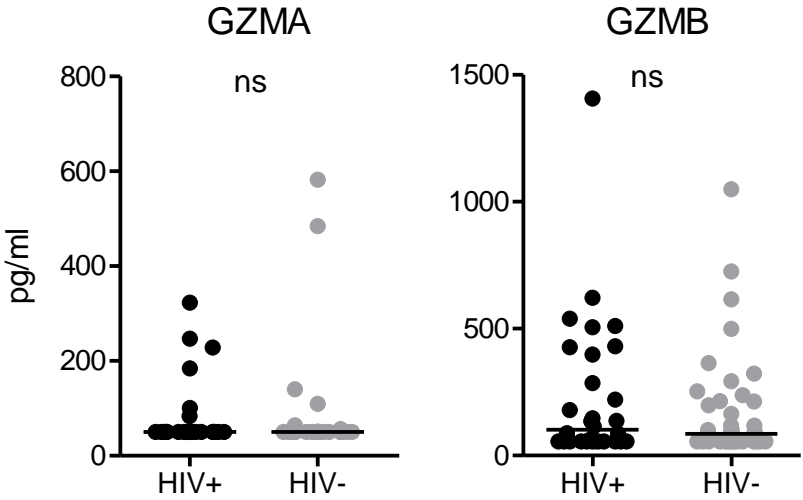

The limit of detection was 50 pg/ml for granzyme A and 55 pg/ml for granzyme B. Horizontal lines indicate medians.

Abbreviations: GZMA: granzyme A. GZMB: granzyme B
